# Supplementary material for: Multiplex mapping of chromatin accessibility and DNA methylation within targeted single molecules identifies epigenetic heterogeneity in neural stem cells and glioblastoma
Source: HighWire-hosted journal article supplement (doi:10.1101/gr.161737.113), 2013-10-08
Supplement: Supplemental_Table_1.xlsx [file Supplemental_Table_1.xlsx]

## Sheet: Supplemental Table S1
Supplemental Table S1. Distance from TSS and site information of captured promoters.
Gene	Accession	Length (bp)	TSS from left (bp)	TSS from right (bp)	#HCG	#GCH	#GCG
ABCB8	NM_007188	179	-231	-53	5	13	3
AOC1 (ABP1)	NM_001091	207	-506	-300	4	12	1
ACSL5	NM_016234	235	-588	-354	3	11	2
MAMDC4 (AEGP)	NM_206920	221	-364	-144	5	21	1
BCL9	NM_004326	256	550	295	3	16	2
RNF219 (C13orf7)	NM_024546	269	-446	-178	8	6	2
JKAMP (C14orf100)	NM_016475	287	-377	-91	28	30	6
CD93 (C1QR1)	NM_012072	172	-314	-143	8	16	0
CDH1	NM_004360	187	32	218	15	23	5
AGAP2 (CENTG1)	NM_014770	190	-452	-263	3	9	0
CLCN3	NM_001829	163	-360	-198	11	13	4
CLEC4C	NM_130441	158	-121	37	6	7	4
XIRP1 (CMYA1)	NM_194293	173	-201	-29	4	8	0
COL19A1	NM_001858	168	-308	-141	4	7	0
CSPP1	NM_024790	330	-584	-255	2	10	1
CYP1A1	NM_000499	259	-588	-330	16	23	7
DBN1	NM_004395	165	-629	-465	3	9	0
DPAGT1	NM_001382	182	-330	-149	6	10	1
DPYD	NM_000110	214	-409	-196	4	12	2
DSCAML1	NM_020693	205	-630	-426	4	9	3
DTNB	NM_183361	189	-312	-124	14	13	5
EGFR	NM_005228	390	-405	-16	21	28	4
EPHB6	NM_004445	172	-414	-243	10	17	3
EPM2AIP1	NM_014805	316	-258	58	12	23	4
ERCC6	NM_000124	171	-127	43	11	18	4
FBXW7	NM_033632	204	-685	-482	16	17	8
FHIT	NM_002012	311	140	450	18	17	6
GEN1 (FLJ40869)	NM_182625	245	-639	-395	28	25	3
GALNS	NM_000512	242	-341	-100	18	22	8
GPR158	NM_020752	315	-629	-315	20	26	17
GSTP1	NM_000852	266	29	294	22	23	15
GUCY1A2	NM_000855	313	-593	-281	11	20	4
H19	AK311497	177	-544	-368	7	13	2
HIST1H1B	NM_005322	208	-490	-283	2	10	1
ICAM5	NM_003259	178	-336	-159	8	14	3
IGFBP3	NM_000598	276	-446	-171	17	17	8
ITGAE	NM_002208	349	-685	-337	7	19	2
KCNQ5	NM_019842	273	-158	114	14	19	7
PRUNE2 (KIAA0367)	NM_015225	235	-519	-285	10	25	8
CTIF (KIAA0427)	NM_014772	220	-402	-183	9	17	6
SZT2 (KIAA0467)	NM_015284	267	32738	33004	6	17	0
KIAA0556	NM_015202	353	-428	-76	21	28	17
SIK3 (KIAA0999)	NM_025164	252	-658	-407	8	11	5
FAM171B (KIAA1946)	NM_177454	212	-447	-236	4	14	1
LAMA1	NM_005559	169	-297	-129	10	12	4
MYLK4 (LOC340156)	NM_001012418	175	-234	-60	3	5	0
LRRFIP1	NM_004735	165	-546	-382	10	11	4
MGMT	NM_002412	255	-108	147	26	25	10
MLH1	NM_000249	373	-188	185	19	18	4
NF1	NM_000267	198	-188	9	13	18	6
NKX2-5	NM_004387	184	2790	2973	4	9	6
NOTCH1	NM_017617	282	-674	-393	28	32	6
NUP214	NM_005085	201	-308	-108	5	14	7
PCDHA9	NM_014005	247	-476	-230	4	9	0
PDCD11	NM_014976	246	-621	-376	13	14	4
PIK3CA	NM_006218	270	645	376	12	21	3
PLEKHA8	NM_032639	334	251	-82	25	23	15
PPM1E	NM_014906	170	-328	-159	5	6	5
PRPF4B	NM_003913	225	-385	-161	8	8	2
RARB	NM_000965	222	83	306	10	11	2
RASSF1	NM_007182	198	-189	9	10	12	9
RP1L1	NM_178857	221	-466	-246	5	13	2
SCN3B	NM_018400	382	-696	-315	5	20	6
EXOC4 (SEC8L1)	NM_021807	345	-621	-277	4	10	0
SEMA3B	NM_004636	316	-92	253	8	21	9
SFRS6	NM_006275	338	-595	-258	23	20	12
SH3TC1	NM_018986	157	-193	-37	6	19	4
SLC8A3	NM_182932	304	-564	-261	6	17	3
SLC9C1 (SLC9A10)	NM_183061	195	-206	-12	2	9	1
SMAD4	NM_005359	217	-272	-56	12	20	9
SORL1	NM_003105	125	-542	-418	1	5	2
SOX10	NM_006941_1	213	897	1111	14	24	8
SULF2	NM_018837	211	-449	-239	13	17	8
TAF1	NM_004606	153	-440	-288	11	10	1
TIAM1	NM_003253	283	-467	-185	22	29	18
TMEM123	NM_052932	383	-582	-200	9	20	2
TNN	NM_022093	161	-605	-445	2	5	1
TP53	NM_000546	154	-181	-28	3	8	3
UHRF2	NM_152896	185	-417	-233	7	12	3
UQCRC2	NM_003366	163	-585	-423	8	8	2
VEPH1	NM_024621	210	-429	-220	5	5	0
XDH	NM_000379	276	-340	-65	2	15	1
ZMYM4 (ZNF262)	NM_005095	302	-394	-93	14	23	7
ZNF646	NM_014699	202	-607	-406	6	16	1
