# Supplementary material for: Multiplex mapping of chromatin accessibility and DNA methylation within targeted single molecules identifies epigenetic heterogeneity in neural stem cells and glioblastoma
Source: HighWire-hosted journal article supplement (doi:10.1101/gr.161737.113), 2013-10-08
Supplement: Supplemental_Table_2.xlsx [file Supplemental_Table_2.xlsx]

## Sheet: Supplemental Table S2
Supplemental Table S2. Barcoded primer assignments and additional capture patch oligonucleotides.
Barcoded 454 primers		Sample
MID1A	CGTATC GCC TCC CTC GCG CCA TCA G (gacat) GGT GTG TGT GGG TAG TTG GTG AT	NSC 0 U M.CviPI
MID1B	CTATGC GCC TTG CCA GCC CGC TCA G (agagc) CTA CCC CAC CTT CCT CAT TCT CT
MID2A	CGTATC GCC TCC CTC GCG CCA TCA G (gagac) GGT GTG TGT GGG TAG TTG GTG AT	GBM L0 0 U M.CviPI
MID2B	CTATGC GCC TTG CCA GCC CGC TCA G (cagat) CTA CCC CAC CTT CCT CAT TCT CT
MID4A	CGTATC GCC TCC CTC GCG CCA TCA G (gacga) GGT GTG TGT GGG TAG TTG GTG AT	NSC 100 U M.CviPI
MID4B	CTATGC GCC TTG CCA GCC CGC TCA G (gcaga) CTA CCC CAC CTT CCT CAT TCT CT
MID5A	CGTATC GCC TCC CTC GCG CCA TCA G (acgat) GGT GTG TGT GGG TAG TTG GTG AT	GBM L0 100 U M.CviPI
MID5B	CTATGC GCC TTG CCA GCC CGC TCA G (actag) CTA CCC CAC CTT CCT CAT TCT CT
Additonal patch oligonucleotide sequences
APC_Left	GAA ACG GAG ATG AGC AAG TTA TTA TTT TGT AGA TCA CCA ACT ACC CAC ACA CAC C
APC_Right	CTA CCC CAC CTT CCT CAT TCT CTC TCC CGG GCC TGA GCC CG
ATM_Left	CAG GAG ATG CGG CGC AGG AGA TCA CCA ACT ACC CAC ACA CAC C
ATM_Right	CTA CCC CAC CTT CCT CAT TCT CTC TAC CTA CTC CCG CTT CCG GTT
CDH1_Left	GGA GTC TGA ACT GAC TTC CGC AAG ATC ACC AAC TAC CCA CAC ACA CC
CDH1_Right	CTA CCC CAC CTT CCT CAT TCT CTC TTG CGG CCC GAA TGC GTC CCT
CDH13_Left	ACA AAT CAC GCT GGG CAA TGC CAG ATC ACC AAC TAC CCA CAC ACA CC
CDH13_Right	CTA CCC CAC CTT CCT CAT TCT CTC TCT CTC CTC CTC CCG TTA ACG AA
CLEC4C_Left	TGT CTT CAG CAT TGT CCT TTT AAA AGT GAG ATC ACC AAC TAC CCA CAC ACA CC
CLEC4C_Right	CTA CCC CAC CTT CCT CAT TCT CTC TCC TGG TCT CCA TGG CAA CCG
DAPK1_Left	GCC CTG GCT GGG AAA GCA AAA GAT CAC CAA CTA CCC ACA CAC ACC
DAPK1_Right	CTA CCC CAC CTT CCT CAT TCT CTC TTT CCC ACC TCC AGG GAC GC
EGFR_Left	TTC TTT TGT TTT ACA AAG CAA ACT TGT ACC AGA TCA CCA ACT ACC CAC ACA CAC C
EGFR_Right	CTA CCC CAC CTT CCT CAT TCT CTC TCG CGC GGG CCG AGG C
EPM2AIP1_Left	GTC TGT CGC CGC CTC ATC GTA GAT CAC CAA CTA CCC ACA CAC ACC
EPM2AIP1_Right	CTA CCC CAC CTT CCT CAT TCT CTC TCG GGG AAT ACG AAA TAT CCA GCC
FHIT_Left	CCC TAC CTT CCA GGA TGT TGA CAG ATC ACC AAC TAC CCA CAC ACA CC
FHIT_Right	CTA CCC CAC CTT CCT CAT TCT CTC TGT GGC GTC CCC GGA CCC
GSTP1_Left	CCC GGA GTC GCC GCG CAG ATC ACC AAC TAC CCA CAC ACA CC
GSTP1_Right	CTA CCC CAC CTT CCT CAT TCT CTC TCT GAG CCC CAT CCC CGG
MGMT_Left	GCG CGC GGG GGC GGA GAT CAC CAA CTA CCC ACA CAC ACC
MGMT_Right	CTA CCC CAC CTT CCT CAT TCT CTC TCC GCA CTC TTC CGG GAG C
MLH1_Left	CAG TTC TCA ATC ATC TCT TTG ATA GCA TTA GAT CAC CAA CTA CCC ACA CAC ACC
MLH1_Right	CTA CCC CAC CTT CCT CAT TCT CTC TTT TAT ACA TCT TTT AAC TTC GCA TGT TCT G
p14ARF_Left	CCT GGA ACG CAA CTC CAG GCA GAT CAC CAA CTA CCC ACA CAC ACC
p14ARF_Right	CTA CCC CAC CTT CCT CAT TCT CTC TCG GCA GCC GCT GCG CC
p53BP2_Left	CGG CCG CGG GAA CGG GAG ATC ACC AAC TAC CCA CAC ACA CC
p53BP2_Right	CTA CCC CAC CTT CCT CAT TCT CTC TGA GGT GCC CCG GAG GGT
RARB_Left	TCG GCA TCC CAG TCC TCA AAC AGA TCA CCA ACT ACC CAC ACA CAC C
RARB_Right	CTA CCC CAC CTT CCT CAT TCT CTC TAA AAG CCT GTA ATT GAT CCA AAT GAT CAT T
RASSF1_Left	ATA CCC GTG TTT CTG GAG GCC AGA TCA CCA ACT ACC CAC ACA CAC C
RASSF1_Right	CTA CCC CAC CTT CCT CAT TCT CTC TGA GGA GAG CCG CGC AAT GGA
SEMA3B_Left	GGC AGG CAG CCG GGA CCA GAT CAC CAA CTA CCC ACA CAC ACC
SEMA3B_Right	CTA CCC CAC CTT CCT CAT TCT CTC TCC TGG CCC CAT CCC AGG C
STK11_Left	CTC CCG CCG CGG CCA ACA GAT CAC CAA CTA CCC ACA CAC ACC
STK11_Right	CTA CCC CAC CTT CCT CAT TCT CTC TGC TGC GGG TCC ACC ACC T
TIMP3_Left	GGG AAG CCA TCT GCT GTT TGC AGA TCA CCA ACT ACC CAC ACA CAC C
TIMP3_Right	CTA CCC CAC CTT CCT CAT TCT CTC TGG AGG AGC AAG AGG AGG AGG
