# Supplementary material for: Multiplex mapping of chromatin accessibility and DNA methylation within targeted single molecules identifies epigenetic heterogeneity in neural stem cells and glioblastoma
Source: HighWire-hosted journal article supplement (doi:10.1101/gr.161737.113), 2013-10-08
Supplement: Supplemental_Table_3.xlsx [file Supplemental_Table_3.xlsx]

## Sheet: Supplemental Table S3
Supplemental Table S3. Quantification of GC accessibility and CG methylation in NSC.
Gene	Reads	#Nuc occupied a	1 – fraction nuc occupied b	#With 3 consecutive G-m5C c	Fraction with 3 consecutive G-m5C d	GC score e	Chromatin class f	Fraction CG methylation g	Methylation class h
TNN	180	176	0.0222222	0	0	0.0111111	I	0.861582	M
RNF219 (C13orf7)	23	22	0.0434783	0	0	0.0217391	I	0.0108696	U
VEPH1	130	124	0.0461538	4	0.0307692	0.0384615	I	0.696262	V
RP1L1	24	24	0	2	0.0833333	0.0416667	I	0.916667	M
PCDHA9	195	173	0.112821	0	0	0.0564103	I	0.317295	V
XIRP1 (CMYA1)	59	54	0.0847458	2	0.0338983	0.059322	I	0.872881	M
SLC9C1 (SLC9A10)	202	185	0.0841584	8	0.039604	0.0618812	I	0.914573	M
ACSL5	87	81	0.0689655	5	0.0574713	0.0632184	I	0.725869	V
DSCAML1	189	168	0.111111	8	0.042328	0.0767196	I	0.9039	M
AGAP2 (CENTG1)	310	271	0.125806	9	0.0290323	0.0774194	I	0.731654	V
NKX2-5	76	65	0.144737	2	0.0263158	0.0855263	I	0.0666667	U
SOX10	105	90	0.142857	7	0.0666667	0.104762	I	0.90757	M
SORL1	340	293	0.138235	30	0.0882353	0.113235	I	0.80826	M
COL19A1	281	221	0.213523	7	0.024911	0.119217	I	0.47482	V
MYLK4 (LOC340156)	186	142	0.236559	1	0.00537634	0.120968	I	0.948029	M
FAM171B (KIAA1946)	75	62	0.173333	7	0.0933333	0.133333	I	0.123077	U
HIST1H1B	104	90	0.134615	15	0.144231	0.139423	I	0.383495	V
DBN1	211	155	0.265403	18	0.0853081	0.175355	I	0.594595	V
PRPF4B	52	38	0.269231	5	0.0961538	0.182692	I	0.0505319	U
CYP1A1	32	30	0.0625	10	0.3125	0.1875	I	0.00588235	U
RASSF1	39	27	0.307692	5	0.128205	0.217949	MI	0.338798	V
H19	93	67	0.27957	15	0.16129	0.22043	MI	0.503987	V
CD93 (C1QR1)	68	46	0.323529	13	0.191176	0.257353	MI	0.386538	V
SIK3 (KIAA0999)	26	20	0.230769	8	0.307692	0.269231	MI	0.035533	U
RARB	101	75	0.257426	30	0.29703	0.277228	MI	0.0218778	U
PDCD11	45	32	0.288889	12	0.266667	0.277778	MI	0.00552486	U
MAMDC4 (AEGP)	55	36	0.345455	14	0.254545	0.3	MI	0.933852	M
CLEC4C	378	209	0.44709	78	0.206349	0.32672	MI	0.0890076	U
CTIF (KIAA0427)	50	40	0.2	23	0.46	0.33	MI	0.0342466	U
UHRF2	62	38	0.387097	17	0.274194	0.330645	MI	0.0991736	U
PPM1E	158	80	0.493671	31	0.196203	0.344937	MI	0.00766284	U
LRRFIP1	34	17	0.5	8	0.235294	0.367647	MI	0.0261194	U
FBXW7	51	31	0.392157	20	0.392157	0.392157	MI	0.00888325	U
ICAM5	142	81	0.429577	52	0.366197	0.397887	H	0.00707339	U
UQCRC2	26	12	0.538462	7	0.269231	0.403846	H	0.00485437	U
ZNF646	180	115	0.361111	83	0.461111	0.411111	H	0.00749766	U
CDH1	45	26	0.422222	22	0.488889	0.455556	H	0.0549777	U
TAF1	190	90	0.526316	77	0.405263	0.465789	H	0.29034	V
DTNB	124	64	0.483871	56	0.451613	0.467742	H	0.0526316	U
DPYD	111	54	0.513514	48	0.432432	0.472973	H	0.00993377	U
TP53	142	27	0.809859	20	0.140845	0.475352	H	0.00882353	U
SULF2	105	56	0.466667	57	0.542857	0.504762	H	0.0104418	U
EPHB6	146	67	0.541096	69	0.472603	0.506849	H	0.00544323	U
JKAMP (C14orf100)	30	18	0.4	20	0.666667	0.533333	H	0.0150943	U
CLCN3	213	76	0.643192	110	0.516432	0.579812	H	0.00331596	U
PRUNE2 (KIAA0367)	24	7	0.708333	14	0.583333	0.645833	MA	0.0102041	U
SH3TC1	216	36	0.833333	157	0.726852	0.780093	MA	0.0899225	U
GALNS	88	21	0.761364	73	0.829545	0.795455	MA	0.0244399	U
NF1	63	10	0.84127	50	0.793651	0.81746	A	0.0207612	U
NUP214	166	31	0.813253	139	0.837349	0.825301	A	0.0134969	U
ABCB8	139	7	0.94964	105	0.755396	0.852518	A	0.011544	U
PIK3CA	44	5	0.886364	39	0.886364	0.886364	A	0.0122449	U
SMAD4	49	3	0.938776	47	0.959184	0.94898	A	0.0179856	U
ERCC6	73	3	0.958904	69	0.945205	0.952055	A	0.0375	U
ITGAE	11	11	0	1	0.0909091	0.0454545	N/A	0.972973	M
FHIT	18	18	0	2	0.111111	0.0555556	N/A	0.127341	U
AOC1 (ABP1)	16	15	0.0625	1	0.0625	0.0625	N/A	0.75	V
KCNQ5	16	15	0.0625	1	0.0625	0.0625	N/A	0.0192308	U
CSPP1	19	18	0.0526316	3	0.157895	0.105263	N/A	0.611111	V
XDH	15	13	0.133333	2	0.133333	0.133333	N/A	0.6	V
IGFBP3	14	12	0.142857	3	0.214286	0.178571	N/A	0.0347826	U
BCL9	12	8	0.333333	2	0.166667	0.25	N/A	0	U
DPAGT1	15	6	0.6	2	0.133333	0.366667	N/A	0.0333333	U
SLC8A3	12	10	0.166667	8	0.666667	0.416667	N/A	0	U
LAMA1	18	5	0.722222	7	0.388889	0.555556	N/A	0.0666667	U
GEN1 (FLJ40869)	12	5	0.583333	9	0.75	0.666667	N/A	0.0228013	U
EPM2AIP1	12	6	0.5	10	0.833333	0.666667	N/A	0.00588235	U
TIAM1	16	6	0.625	13	0.8125	0.71875	N/A	0.0283019	U
GPR158	13	6	0.538462	13	1	0.769231	N/A	0.026087	U
PLEKHA8	14	5	0.642857	13	0.928571	0.785714	N/A	0.0318021	U
ZMYM4 (ZNF262)	12	5	0.583333	12	1	0.791667	N/A	0.037594	U
SFRS6	17	5	0.705882	15	0.882353	0.794118	N/A	0.0207101	U
GSTP1	19	1	0.947368	19	1	0.973684	N/A	0.0215054	U
a Number (#) of reads per locus that exhibited ≥126 bp of unmethylated GC sites, i.e. consistent with nucleosome (nuc) occupancy.
b Fraction of molecules lacking nucleosomes (accessible) at each locus.
c Number of reads per locus that contain ≥3 consecutive methylated GC sites, i.e. a nucleosome-free region.
d Fraction of molecules that contain ≥3 consecutive methylated GC sites.
e Average of 1 – fraction nucleosome occupied (column D) and fraction with 3 consecutive G-m5C (column F), reflecting the fraction of molecules that are nucleosome depleted and highly accessible at each locus.
f I, inaccessible; MI, mostly inaccessible; H, half inaccessible; MA, mostly accessible; A, accessible; N/A, not applicable, i.e. <20x sequencing coverage.
g m5CG/(m5CG + CG).
h M, methylated; V, variably methylated; U, unmethylated.
