# Supplementary material for: Multiplex mapping of chromatin accessibility and DNA methylation within targeted single molecules identifies epigenetic heterogeneity in neural stem cells and glioblastoma
Source: HighWire-hosted journal article supplement (doi:10.1101/gr.161737.113), 2013-10-08
Supplement: Supplemental_Table_4.xlsx [file Supplemental_Table_4.xlsx]

## Sheet: Supplemental Table S4
Supplemental Table S4. Quantification of GC accessibility and CG methylation in GBM L0.
Gene	Reads	#Nuc occupied a	1 – fraction nuc occupied b	#With 3 consecutive G-m5C c	Fraction with 3 consecutive G-m5C d	GC score e	Chromatin class f	Fraction CG methylation g	Methylation class h
RNF219 (C13orf7)	29	28	0.0344828	0	0	0.0172414	I	0.0137615	U
VEPH1	67	65	0.0298507	1	0.0149254	0.0223881	I	0.844985	M
TNN	316	300	0.0506329	3	0.00949367	0.0300633	I	0.791935	V
NKX2-5	81	75	0.0740741	0	0	0.037037	I	0.786008	V
IGFBP3	54	51	0.0555556	2	0.037037	0.0462963	I	0.952381	M
XDH	20	19	0.05	1	0.05	0.05	I	0.7	V
EXOC4 (SEC8L1)	35	32	0.0857143	2	0.0571429	0.0714286	I	0.383459	V
ACSL5	102	94	0.0784314	7	0.0686275	0.0735294	I	0.506711	V
PCDHA9	176	147	0.164773	4	0.0227273	0.09375	I	0.867244	M
MGMT	21	20	0.047619	3	0.142857	0.0952381	I	0.57326	V
RASSF1	43	39	0.0930233	5	0.116279	0.104651	I	0.742243	V
AGAP2 (CENTG1)	314	263	0.16242	18	0.0573248	0.109873	I	0.529736	V
SORL1	219	191	0.127854	21	0.0958904	0.111872	I	0.958904	M
SLC9C1 (SLC9A10)	180	154	0.144444	15	0.0833333	0.113889	I	0.747159	V
SOX10	127	112	0.11811	14	0.110236	0.114173	I	0.969617	M
AOC1 (ABP1)	35	28	0.2	1	0.0285714	0.114286	I	0.642857	V
COL19A1	216	175	0.189815	11	0.0509259	0.12037	I	0.298945	V
DSCAML1	172	137	0.203488	10	0.0581395	0.130814	I	0.875	M
MYLK4 (LOC340156)	178	126	0.292135	3	0.0168539	0.154494	I	0.977528	M
HIST1H1B	99	83	0.161616	16	0.161616	0.161616	I	0.391753	V
XIRP1 (CMYA1)	30	22	0.266667	2	0.0666667	0.166667	I	0.6	V
DBN1	216	166	0.231481	27	0.125	0.178241	I	0.802817	M
KCNQ5	22	17	0.227273	3	0.136364	0.181818	I	0.155172	U
RP1L1	30	27	0.1	8	0.266667	0.183333	I	0.932886	M
FAM171B (KIAA1946)	136	104	0.235294	23	0.169118	0.202206	MI	0.0892116	U
RARB	74	59	0.202703	15	0.202703	0.202703	MI	0.435484	V
PDCD11	50	37	0.26	8	0.16	0.21	MI	0.0083612	U
CD93 (C1QR1)	105	76	0.27619	19	0.180952	0.228571	MI	0.0329949	U
PRPF4B	81	54	0.333333	11	0.135802	0.234568	MI	0.0121528	U
DPYD	188	142	0.244681	48	0.255319	0.25	MI	0.0211132	U
MAMDC4 (AEGP)	73	50	0.315068	14	0.191781	0.253425	MI	0.876106	M
LRRFIP1	35	22	0.371429	6	0.171429	0.271429	MI	0.42953	V
CLEC4C	226	132	0.415929	40	0.176991	0.29646	MI	0.125848	U
UHRF2	70	47	0.328571	19	0.271429	0.3	MI	0.125301	U
CYP1A1	39	29	0.25641	17	0.435897	0.346154	MI	0.0145396	U
ZNF646	166	113	0.319277	62	0.373494	0.346386	MI	0.00306748	U
PPM1E	194	98	0.494845	39	0.201031	0.347938	MI	0.022869	U
SIK3 (KIAA0999)	47	29	0.382979	15	0.319149	0.351064	MI	0.0114286	U
CDH1	40	23	0.425	13	0.325	0.375	MI	0.516835	V
FBXW7	48	28	0.416667	18	0.375	0.395833	H	0.0190736	U
H19	80	42	0.475	26	0.325	0.4	H	0.364151	V
EPHB6	221	118	0.466063	79	0.357466	0.411765	H	0.0305067	U
UQCRC2	49	21	0.571429	13	0.265306	0.418367	H	0.00544959	U
SULF2	175	113	0.354286	90	0.514286	0.434286	H	0.0139894	U
DTNB	130	69	0.469231	53	0.407692	0.438462	H	0.0513433	U
CTIF (KIAA0427)	43	26	0.395349	22	0.511628	0.453488	H	0.0237467	U
EGFR	43	31	0.27907	28	0.651163	0.465116	H	0.0317662	U
JKAMP (C14orf100)	33	20	0.393939	21	0.636364	0.515152	H	0.0116822	U
CLCN3	185	74	0.6	85	0.459459	0.52973	H	0.00767965	U
PLEKHA8	22	12	0.454545	14	0.636364	0.545455	H	0.021322	U
BCL9	22	7	0.681818	9	0.409091	0.545455	H	0	U
ICAM5	185	76	0.589189	94	0.508108	0.548649	H	0.045859	U
TP53	87	6	0.931034	17	0.195402	0.563218	H	0.0112994	U
SFRS6	21	12	0.428571	15	0.714286	0.571429	H	0.0121359	U
DPAGT1	38	5	0.868421	15	0.394737	0.631579	MA	0.00694444	U
PIK3CA	37	16	0.567568	27	0.72973	0.648649	MA	0.0117925	U
EPM2AIP1	30	13	0.566667	26	0.866667	0.716667	MA	0.0183066	U
TAF1	126	20	0.84127	76	0.603175	0.722222	MA	0.0104754	U
GALNS	71	21	0.704225	53	0.746479	0.725352	MA	0.0211827	U
TIAM1	20	8	0.6	19	0.95	0.775	MA	0.0208333	U
PRUNE2 (KIAA0367)	30	7	0.766667	25	0.833333	0.8	MA	0.0192308	U
NF1	65	7	0.892308	47	0.723077	0.807692	A	0.0204082	U
NUP214	135	24	0.822222	111	0.822222	0.822222	A	0.020155	U
SMAD4	49	6	0.877551	44	0.897959	0.887755	A	0.0159292	U
ABCB8	143	3	0.979021	126	0.881119	0.93007	A	0.00840336	U
ERCC6	83	5	0.939759	77	0.927711	0.933735	A	0.0221484	U
SH3TC1	186	10	0.946237	172	0.924731	0.935484	A	0.0426497	U
ITGAE	19	19	0	1	0.0526316	0.0263158	N/A	0.930233	M
GUCY1A2	10	8	0.2	0	0	0.1	N/A	0.0480769	U
FHIT	13	12	0.0769231	2	0.153846	0.115385	N/A	0.113636	U
SLC8A3	12	11	0.0833333	2	0.166667	0.125	N/A	0.0208333	U
SCN3B	11	11	0	3	0.272727	0.136364	N/A	0.159091	U
SZT2 (KIAA0467)	13	12	0.0769231	4	0.307692	0.192308	N/A	0.974359	M
CSPP1	19	15	0.210526	5	0.263158	0.236842	N/A	0.527778	V
TMEM123	13	11	0.153846	5	0.384615	0.269231	N/A	0.117647	U
SEMA3B	18	17	0.0555556	9	0.5	0.277778	N/A	0.194444	U
GPR158	12	8	0.333333	8	0.666667	0.5	N/A	0	U
MLH1	17	12	0.294118	12	0.705882	0.5	N/A	0.0135135	U
KIAA0556	10	5	0.5	7	0.7	0.6	N/A	0.0165746	U
ZMYM4 (ZNF262)	16	7	0.5625	12	0.75	0.65625	N/A	0.0368098	U
NOTCH1	12	4	0.666667	8	0.666667	0.666667	N/A	0.025	U
GSTP1	18	2	0.888889	18	1	0.944444	N/A	0.0148368	U
a Number (#) of reads per locus that exhibited ≥126 bp of unmethylated GC sites, i.e. consistent with nucleosome (nuc) occupancy.
b Fraction of molecules lacking nucleosomes (accessible) at each locus.
c Number of reads per locus that contain ≥3 consecutive methylated GC sites, i.e. a nucleosome-free region.
d Fraction of molecules that contain ≥3 consecutive methylated GC sites.
e Average of 1 – fraction nucleosome occupied (column D) and fraction with 3 consecutive G-m5C (column F), reflecting the fraction of molecules that are nucleosome depleted and highly accessible at each locus.
f I, inaccessible; MI, mostly inaccessible; H, half inaccessible; MA, mostly accessible; A, accessible; N/A, not applicable, i.e. <20x sequencing coverage.
g m5CG/(m5CG + CG).
h M, methylated; V, variably methylated; U, unmethylated.
