# Supplementary material for: Multiplex mapping of chromatin accessibility and DNA methylation within targeted single molecules identifies epigenetic heterogeneity in neural stem cells and glioblastoma
Source: HighWire-hosted journal article supplement (doi:10.1101/gr.161737.113), 2013-10-08
Supplement: Supplemental_Table_5.xlsx [file Supplemental_Table_5.xlsx]

## Sheet: Supplemental Table S5
Supplemetal Table S5. Integrated GC accessibility and CG methylation.
Percent distribution of all promoters (≥20x coverage) from NSC (left) and GBM L0 (right) into 15 integrated epigenetic classes
NSC all	Unmethylated	Variable	Methylated		GBM all	Unmethylated	Variable	Methylated
Inaccessible	9.25926	12.963	14.8148		Inaccessible	2.98507	19.403	13.4328
Mostly inaccessible	16.6667	5.55556	1.85185		Mostly inaccessible	16.4179	4.47761	1.49254
Half accessible	20.3704	1.85185	0		Half accessible	20.8955	1.49254	0
Mostly accessible	5.55556	0	0		Mostly accessible	8.95522	0	0
Accessible	11.1111	0	0		Accessible	10.4478	0	0
